# Supplementary material for: iGlarLixi effectively reduces residual hyperglycaemia in patients with type 2 diabetes on basal insulin: A post hoc analysis from the LixiLan‐L study
Source: PubMed Central journal article supplement — Diabetes Obes Metab. 2020 May 28;22(9):1683–9. doi: 10.1111/dom.14077 (PMC7497103; doi:10.1111/dom.14077), 2020-05-28
Supplement: DOM-22-1683-s003.pdf [file DOM-22-1683-s003.pdf]

Suppl Figure 2

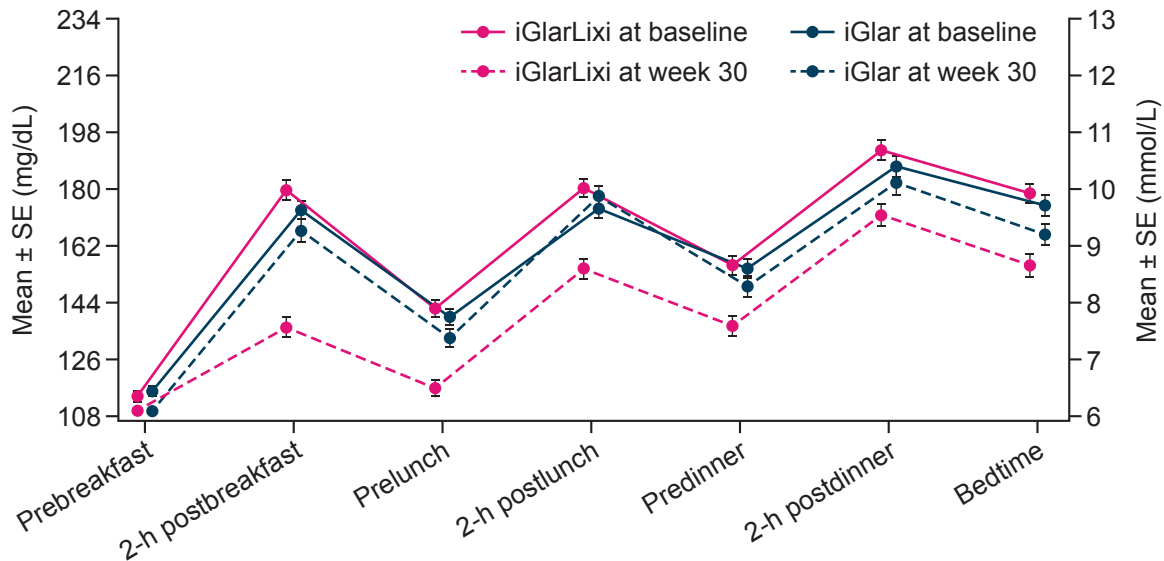**Number of subjects**

iGlarLixi at baseline

221

215

212

214

216

212

200

iGlar at baseline

219

214

211

216

213

213

203

iGlarLixi at week 30

185

185

183

184

181

184

169

iGlar at week 30

194

187

189

189

191

185

176
