# Supplementary figures and images for: iGlarLixi effectively reduces residual hyperglycaemia in patients with type 2 diabetes on basal insulin: A post hoc analysis from the LixiLan‐L study
Source: PubMed Central journal article supplement — Diabetes Obes Metab. 2020 May 28;22(9):1683–9. doi: 10.1111/dom.14077 (PMC7497103; doi:10.1111/dom.14077), 2020-05-28

Suppl Figure 1

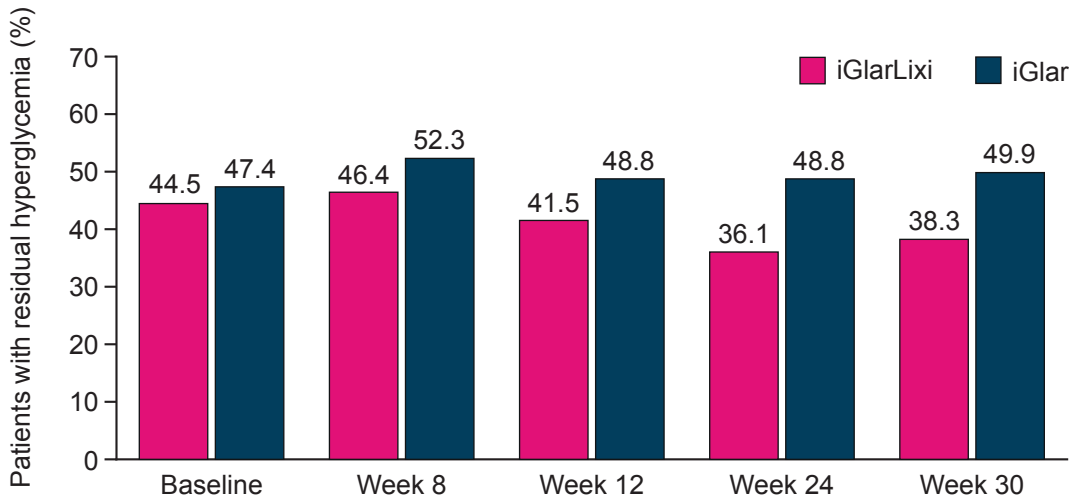

Supplement: DOM-22-1683-s002.pdf [file DOM-22-1683-s002.pdf]
